# Supplementary material for: A New Lamellar Gold Thiolate Coordination Polymer, [Au(m-SPhCO2H)]n, for the Formation of Luminescent Polymer Composites
Source: PubMed Central journal article supplement (PMC6835532; doi:10.3390/nano9101408), 2019-10-02
Supplement: nanomaterials-09-01408-s001.pdf [file nanomaterials-09-01408-s001.pdf]

Electronic Supporting Information for:

# A New Lamellar Gold Thiolate Coordination Polymer, $[\text{Au}(m\text{-SPhCO}_2\text{H})]_n$ , for the Formation of Luminescent Polymer Composites

Oleksandra Veselska <sup>1</sup>, Nathalie Guillou <sup>2</sup>, Gilles Ledoux <sup>3</sup>, Chia-Ching Huang <sup>4</sup>, Katerina Dohnalova Newell <sup>4</sup>, Erik Elkaïm <sup>5</sup>, Alexandra Fateeva <sup>6</sup> and Aude Demessence <sup>1,\*</sup>

<sup>1</sup> Institut de Recherches sur la Catalyse et l'Environnement de Lyon (IRCELYON), Université Claude Bernard Lyon 1, UMR CNRS 5256, 69626 Villeurbanne, France; oleksandra.veselska@ircelyon.univ-lyon1.fr

<sup>2</sup> Institut Lavoisier de Versailles (ILV), UVSQ, Université Paris-Saclay, UMR CNRS 8180, 78035 Versailles, France; nathalie.guillou@uvsq.fr

<sup>3</sup> Institut Lumière Matière (ILM), Université Claude Bernard Lyon 1, UMR CNRS 5306, 69626 Villeurbanne, France; gilles.ledoux@univ-lyon1.fr

<sup>4</sup> Institute of Physics, University of Amsterdam, Science Park 904, 1098 XH Amsterdam, The Netherlands; c.huang@uva.nl (C.-C.H.); k.newell@uva.nl (K.D.N.)

<sup>5</sup> Beamline Cristal, Synchrotron Soleil, 91192 Gif-sur-Yvette, France; erik.elkaim@synchrotron-soleil.fr

<sup>6</sup> Laboratoire des Multimatériaux et Interfaces (LMI), Université Claude Bernard Lyon 1, UMR CNRS 5615, 69626 Villeurbanne, France; alexandra.fateeva@univ-lyon1.fr

\* Correspondence: aude.demessence@ircelyon.univ-lyon1.fr

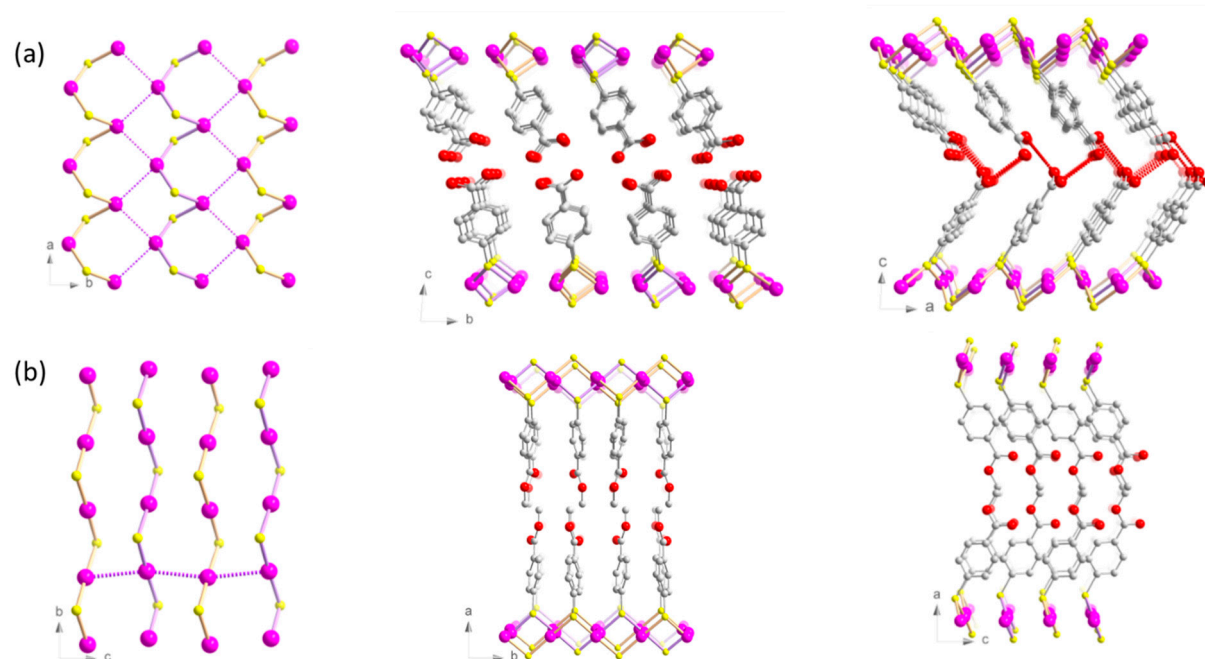

**Figure 1.** Structure representations of (a)  $[\text{Au}(p\text{-SPhCO}_2\text{H})]_n$  [1] and (b)  $[\text{Au}(p\text{-SPhCO}_2\text{Me})]_n$  [2]. Pink, Au; yellow, S; red, O; grey, C. Hydrogen atoms are omitted for clarity. Red and purple dotted lines represent the hydrogen bonds and the aurophilic interactions, respectively.

**Table S1** Crystallographic data and Rietveld refinement parameters for  $[\text{Au}(m\text{-SPhCO}_2\text{H})]_n$ .

| Empirical formula | $\text{C}_7\text{H}_5\text{Au}_1\text{O}_2\text{S}_1$ |
|-------------------|-------------------------------------------------------|
| $M_r$             | 350.15                                                |
| Crystal system    | Triclinic                                             |

|                                        |              |
|----------------------------------------|--------------|
| Space group                            | <i>P1</i>    |
| <i>a</i> (Å)                           | 4.7567(5)    |
| <i>b</i> (Å)                           | 4.7632(6)    |
| <i>c</i> (Å)                           | 16.3975(5)   |
| $\alpha$ (°)                           | 90.780(8)    |
| $\beta$ (°)                            | 89.123(6)    |
| $\gamma$ (°)                           | 92.651(4)    |
| <i>V</i> (Å <sup>3</sup> )             | 371.05(6)    |
| <i>Z</i>                               | 2            |
| $\lambda$ (Å)                          | 0.79276      |
| Number of reflections                  | 618          |
| Number of fitted structural parameters | 27           |
| $R_p, R_{wp}$                          | 0.061, 0.090 |
| $R_{Bragg}, GoF$                       | 0.037, 1.68  |

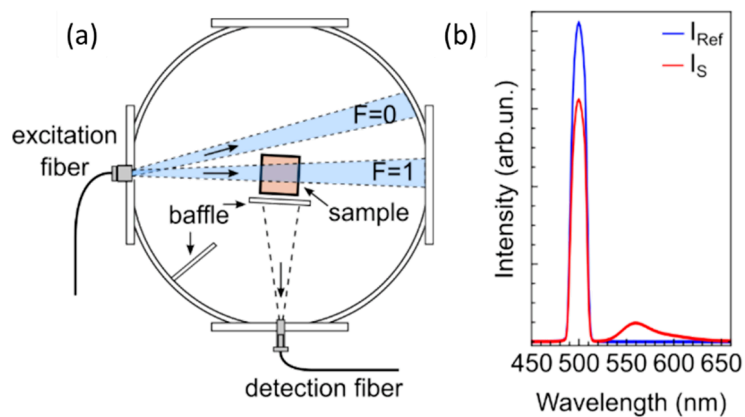

**Figure 2.** A scheme of a used standard integrating sphere setup was used (a) and a graphical representation of emission intensities detected with sample and reference (b).

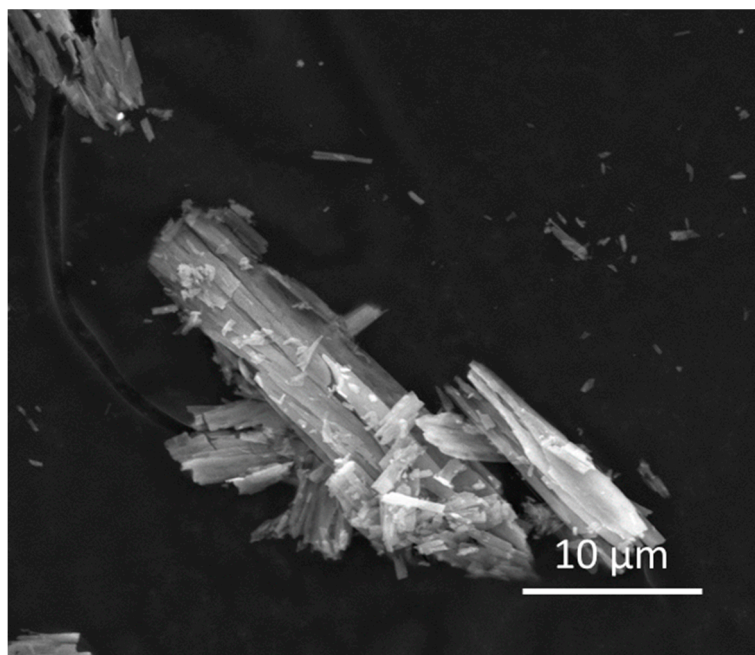

Figure 3. SEM image of [Au(*m*-SPhCO<sub>2</sub>H)]<sub>n</sub>.

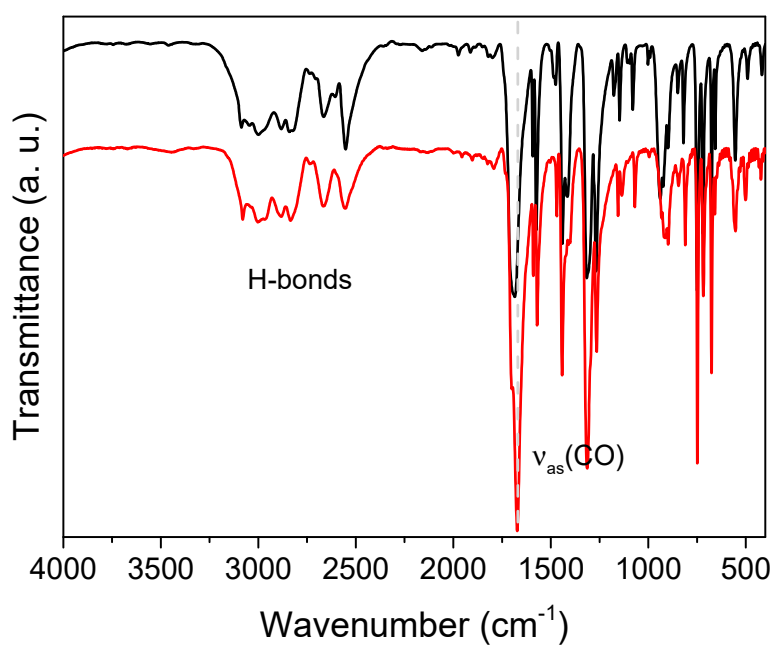

Figure 4. FT-IR spectra of the free ligand (black) and [Au(*m*-SPhCO<sub>2</sub>H)]<sub>n</sub> (red).

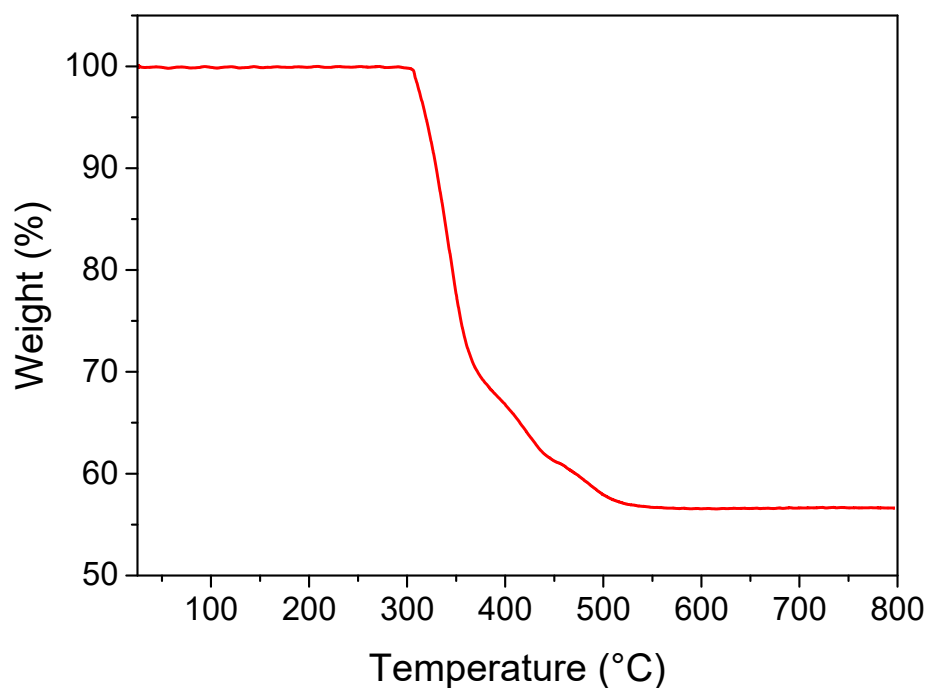

Figure 5. The TGA conducted under air at 10°C/min of [Au(*m*-SPhCO<sub>2</sub>H)]<sub>n</sub>.

Table 2. Comparison of the main distances and angles in [Au(*m*-SPhCO<sub>2</sub>H)]<sub>n</sub> and other lamellar [Au(SR)]<sub>n</sub> CPs, [Au(*p*-SPhCO<sub>2</sub>H)]<sub>n</sub> [1] and [Au(*p*-SPhCO<sub>2</sub>Me)]<sub>n</sub> [2].

| Compound                                            | Au-S<br>Å                     | Au-Au<br>Å                                   | S-Au-S<br>°         | Au-S-Au<br>°        | O1-O2<br>Å           | π-π<br>Å | C-H... π Å           |
|-----------------------------------------------------|-------------------------------|----------------------------------------------|---------------------|---------------------|----------------------|----------|----------------------|
| [Au( <i>m</i> -SPhCO <sub>2</sub> H)] <sub>n</sub>  | 2.28(2)<br>2.35(2)<br>2.36(2) | 3.21(2)†<br>3.28(2)†<br>3.38(2)δ<br>3.61(2)δ | 88.2(4)<br>151.1(5) | 85.8(4)<br>90.5(4)  | 2.714(1)<br>3.039(1) | 4.757(1) |                      |
| [Au( <i>p</i> -SPhCO <sub>2</sub> H)] <sub>n</sub>  | 2.27(1)<br>2.34(1)<br>2.37(1) | 3.36(1)δ<br>3.42(1)δ<br>3.59(1)†<br>3.73(1)† | 77.5(3)<br>124.0(4) | 99.4(2)<br>110.4(2) | 2.903(1)<br>3.011(1) | 4.518(1) |                      |
| [Au( <i>p</i> -SPhCO <sub>2</sub> Me)] <sub>n</sub> | 2.31(1)                       | 3.20(1)δ<br>3.51(1)†                         | 177.5(1)            | 97.1(1)             | -                    | -        | 3.233(1)<br>4.200(1) |

† Au-Au intrachain (bridged by sulfur atoms).

δ Au-Au interchain.

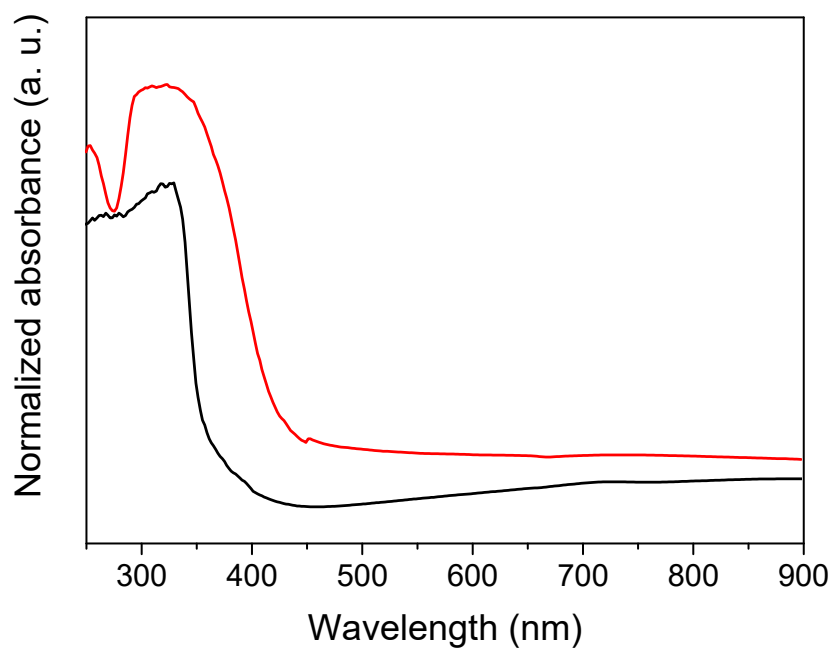

**Figure 6.** UV-vis absorption spectra of  $[\text{Au}(m\text{-SPhCO}_2\text{H})]_n$  (red) and the free ligand (black) conducted in solid state at the room temperature.

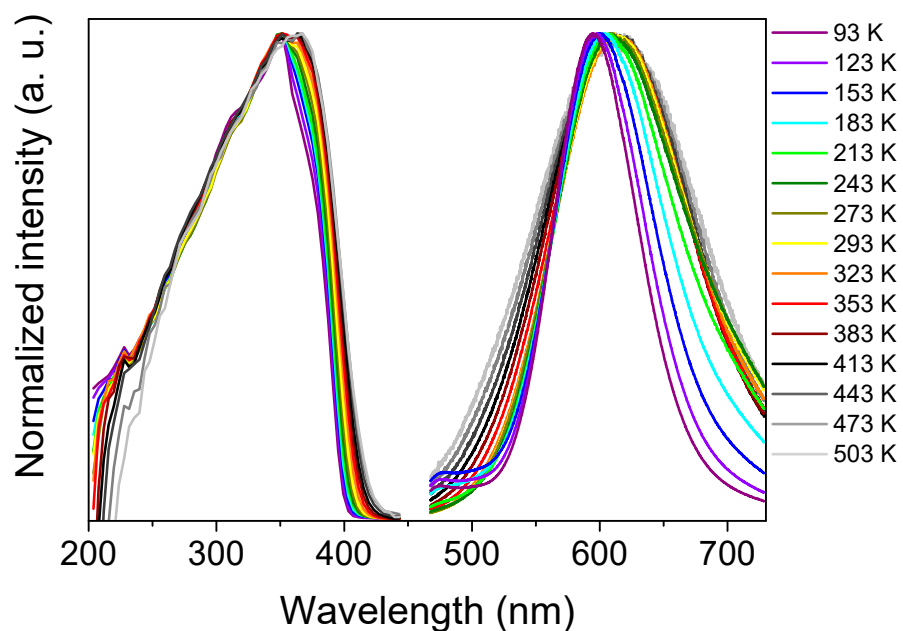

**Figure 7.** Normalized emission-excitation spectra ( $\lambda_{\text{exc}} = 352 \text{ nm}$ ,  $\lambda_{\text{em}} = 596 \text{ nm}$ ) of  $[\text{Au}(m\text{-SPhCO}_2\text{H})]_n$  conducted in solid state at variable temperatures.

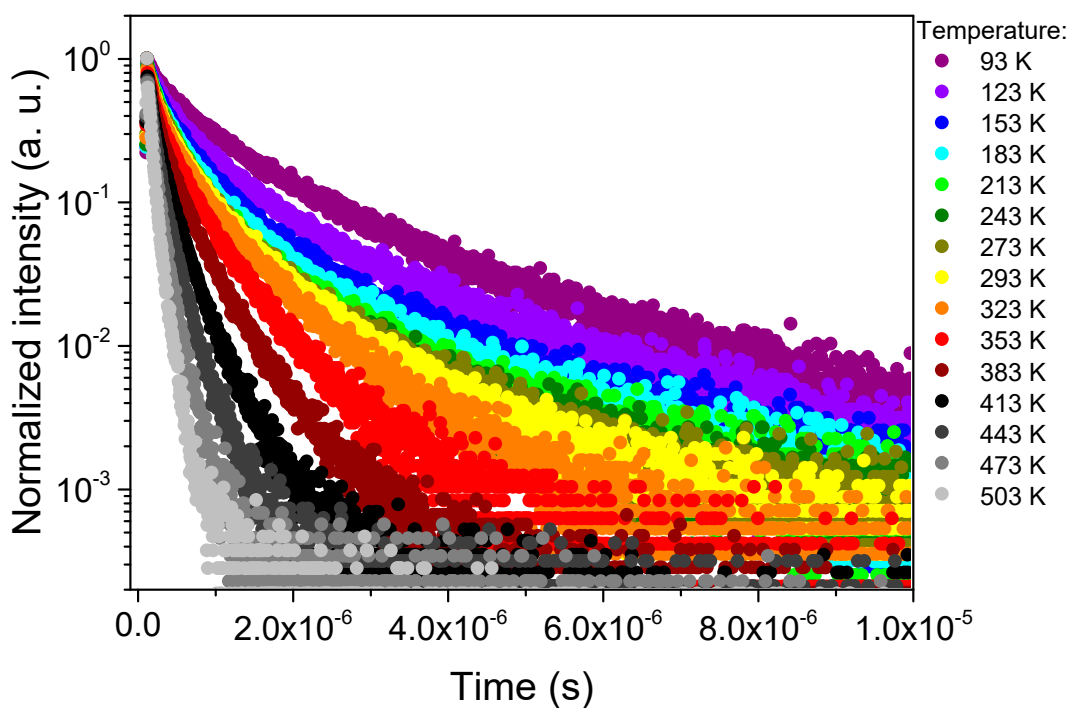

**Figure 8.** Temperature-dependent luminescence decay curves ( $\lambda_{\text{exc}} = 352 \text{ nm}$ ,  $\lambda_{\text{em}} = 610 \text{ nm}$ ) of  $[\text{Au}(m\text{-SPhCO}_2\text{H})]_n$  conducted in solid state at variable temperatures.

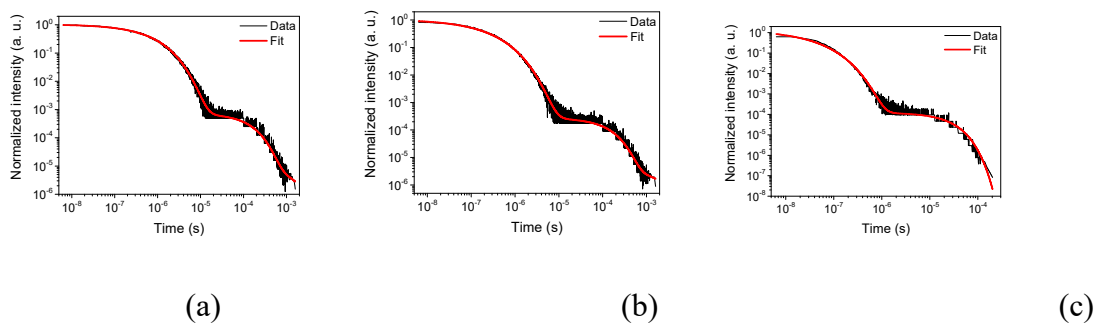

**Figure 9.** Examples of lifetime decay fit of  $[\text{Au}(m\text{-SPhCO}_2\text{H})]_n$  at 93 K (a), 293 K (b) and 503 K (c).

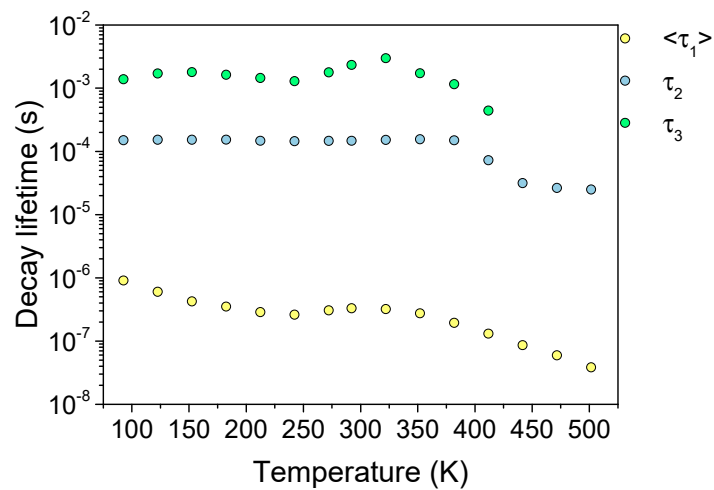

(a).

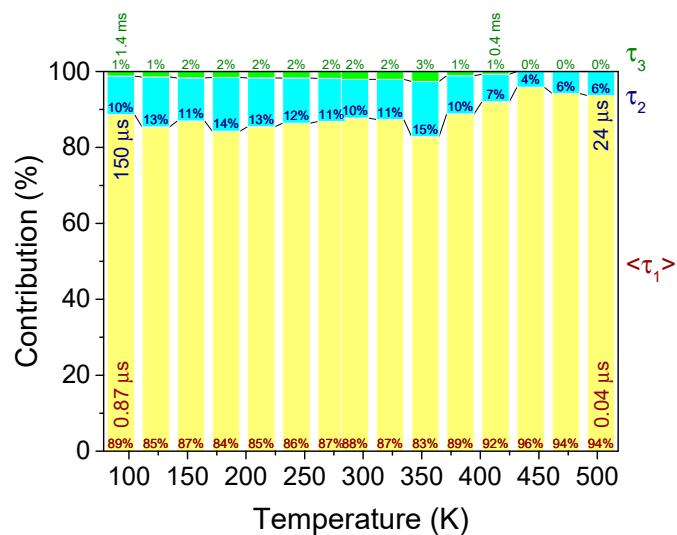

(b)

**Figure 10.** Temperature-dependent luminescence decays of  $[\text{Au}(m\text{-SPhCO}_2\text{H})]_n$ : values of the lifetime (a) and contributions (b) of different components at various temperatures.

Table S2 Luminescence lifetimes ( $\tau_i$ ), their pre-exponential factors ( $a_i$ ), parameters  $\beta_1$ , average lifetimes ( $\langle\tau_i\rangle$ ) and contributions of  $[\text{Au}(m\text{-SPhCO}_2\text{H})_n]$  at 93 to 503 K temperature range.

| Temperature, K | $a_1 \pm \sigma a_1$ | $\tau_1 \pm \sigma \tau_1, \text{ s}$ | $\beta_1 \pm \sigma \beta_1$ | $\langle\tau_1\rangle \pm \sigma\langle\tau_1\rangle, \text{ s}$ | Contribution of $\tau_1, \%$ | $a_2 \pm \sigma a_2$ | $\tau_2 \pm \sigma \tau_2, \text{ s}$ | Contribution of $\tau_2, \%$ | $a_3 \pm \sigma a_3$ | $\tau_3 \pm \sigma \tau_3, \text{ s}$ | Contribution of $\tau_3 \%$ | $R^2$   |
|----------------|----------------------|---------------------------------------|------------------------------|------------------------------------------------------------------|------------------------------|----------------------|---------------------------------------|------------------------------|----------------------|---------------------------------------|-----------------------------|---------|
| 93             | 1.0281 ± 0.0058      | 6.35E-07 ± 6.96E-09                   | 0.649 ± 0.003                | 8.69E-07 ± 1.01E-08                                              | 89                           | 6.84E-04 ± 4.39E-06  | 1.47E-04 ± 8.62E-07                   | 10                           | 8.93E-06 ± 5.37E-07  | 1.37E-03 ± 8.70E-05                   | 1                           | 0.99775 |
| 123            | 1.0663 ± 0.0070      | 3.67E-07 ± 4.80E-09                   | 0.583 ± 0.002                | 5.74E-07 ± 7.92E-09                                              | 85                           | 6.20E-04 ± 3.78E-06  | 1.49E-04 ± 8.06E-07                   | 13                           | 5.95E-06 ± 3.90E-07  | 1.69E-03 ± 1.41E-04                   | 1                           | 0.99772 |
| 153            | 1.1449 ± 0.0093      | 2.26E-07 ± 3.65E-09                   | 0.533 ± 0.002                | 4.05E-07 ± 6.86E-09                                              | 87                           | 3.96E-04 ± 2.65E-06  | 1.49E-04 ± 9.46E-07                   | 11                           | 4.91E-06 ± 3.22E-07  | 1.77E-03 ± 1.57E-04                   | 2                           | 0.99741 |
| 183            | 1.1843 ± 0.0102      | 1.77E-07 ± 3.04E-09                   | 0.516 ± 0.002                | 3.34E-07 ± 6.03E-09                                              | 84                           | 4.32E-04 ± 2.72E-06  | 1.50E-04 ± 8.72E-07                   | 14                           | 4.42E-06 ± 3.10E-07  | 1.61E-03 ± 1.38E-04                   | 2                           | 0.99746 |
| 213            | 1.3044 ± 0.0128      | 1.33E-07 ± 2.59E-09                   | 0.492 ± 0.002                | 2.74E-07 ± 5.63E-09                                              | 85                           | 3.63E-04 ± 2.45E-06  | 1.44E-04 ± 9.28E-07                   | 13                           | 4.80E-06 ± 3.09E-07  | 1.43E-03 ± 1.03E-04                   | 2                           | 0.99724 |
| 243            | 1.3183 ± 0.0131      | 1.17E-07 ± 2.31E-09                   | 0.484 ± 0.002                | 2.49E-07 ± 5.17E-09                                              | 86                           | 3.09E-04 ± 2.08E-06  | 1.41E-04 ± 9.43E-07                   | 12                           | 5.05E-06 ± 2.98E-07  | 1.27E-03 ± 7.53E-05                   | 2                           | 0.99736 |
| 273            | 1.1665 ± 0.0105      | 1.57E-07 ± 2.75E-09                   | 0.522 ± 0.002                | 2.91E-07 ± 5.33E-09                                              | 87                           | 3.01E-04 ± 1.96E-06  | 1.43E-04 ± 9.05E-07                   | 11                           | 3.91E-06 ± 2.37E-07  | 1.76E-03 ± 1.47E-04                   | 2                           | 0.99738 |
| 293            | 1.0452 ± 0.0088      | 1.88E-07 ± 2.96E-09                   | 0.556 ± 0.002                | 3.14E-07 ± 5.19E-09                                              | 88                           | 2.57E-04 ± 1.65E-06  | 1.44E-04 ± 9.06E-07                   | 10                           | 3.30E-06 ± 1.93E-07  | 2.30E-03 ± 2.44E-04                   | 2                           | 0.99744 |
| 323            | 1.0032 ± 0.0074      | 2.02E-07 ± 2.68E-09                   | 0.599 ± 0.002                | 3.04E-07 ± 4.23E-09                                              | 87                           | 2.41E-04 ± 1.33E-06  | 1.49E-04 ± 8.01E-07                   | 11                           | 2.41E-06 ± 1.44E-07  | 2.95E-03 ± 4.02E-04                   | 2                           | 0.99787 |
| 353            | 0.9304 ± 0.0070      | 1.89E-07 ± 2.41E-09                   | 0.644 ± 0.003                | 2.61E-07 ± 3.51E-09                                              | 83                           | 2.71E-04 ± 1.37E-06  | 1.52E-04 ± 7.88E-07                   | 15                           | 2.53E-06 ± 1.79E-07  | 1.70E-03 ± 1.54E-04                   | 3                           | 0.99777 |
| 383            | 0.9701 ± 0.0085      | 1.30E-07 ± 1.84E-09                   | 0.629 ± 0.003                | 1.85E-07 ± 2.74E-09                                              | 89                           | 1.33E-04 ± 7.15E-07  | 1.47E-04 ± 8.76E-07                   | 10                           | 1.87E-06 ± 1.27E-07  | 1.14E-03 ± 6.76E-05                   | 1                           | 0.99766 |
| 413            | 1.0048 ± 0.0103      | 8.74E-08 ± 1.40E-09                   | 0.629 ± 0.003                | 1.24E-07 ± 2.08E-09                                              | 92                           | 1.32E-04 ± 7.97E-07  | 7.05E-05 ± 4.49E-07                   | 7                            | 2.03E-06 ± 1.43E-07  | 4.34E-04 ± 2.04E-05                   | 1                           | 0.9973  |
| 443            | 1.1003 ± 0.0218      | 5.47E-08 ± 1.63E-09                   | 0.604 ± 0.005                | 8.16E-08 ± 2.54E-09                                              | 96                           | 1.16E-04 ± 1.16E-06  | 3.06E-05 ± 1.32E-07                   | 4                            |                      |                                       |                             | 0.99124 |
| 473            | 1.1470 ± 0.0237      | 3.84E-08 ± 1.14E-09                   | 0.612 ± 0.005                | 5.63E-08 ± 1.74E-09                                              | 94                           | 1.37E-04 ± 1.16E-06  | 2.56E-05 ± 8.14E-08                   | 6                            |                      |                                       |                             | 0.99275 |
| 503            | 1.3674 ± 0.0333      | 2.26E-08 ± 7.77E-10                   | 0.574 ± 0.005                | 3.61E-08 ± 1.29E-09                                              | 94                           | 1.16E-04 ± 9.21E-07  | 2.42E-05 ± 6.98E-08                   | 6                            |                      |                                       |                             | 0.99328 |



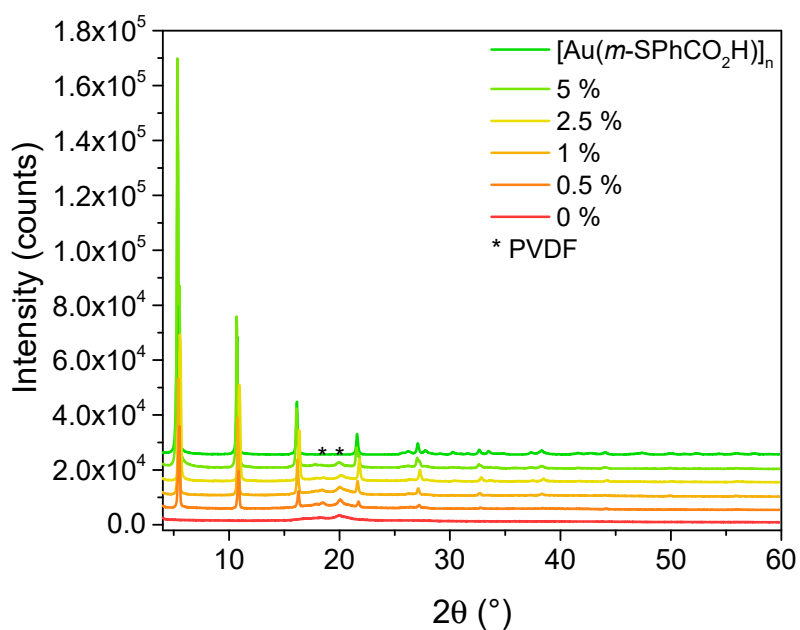

Figure 11. PXRD patterns of x % $[\text{Au}(m\text{-SPhCO}_2\text{H})]_n$ @PVDF films.

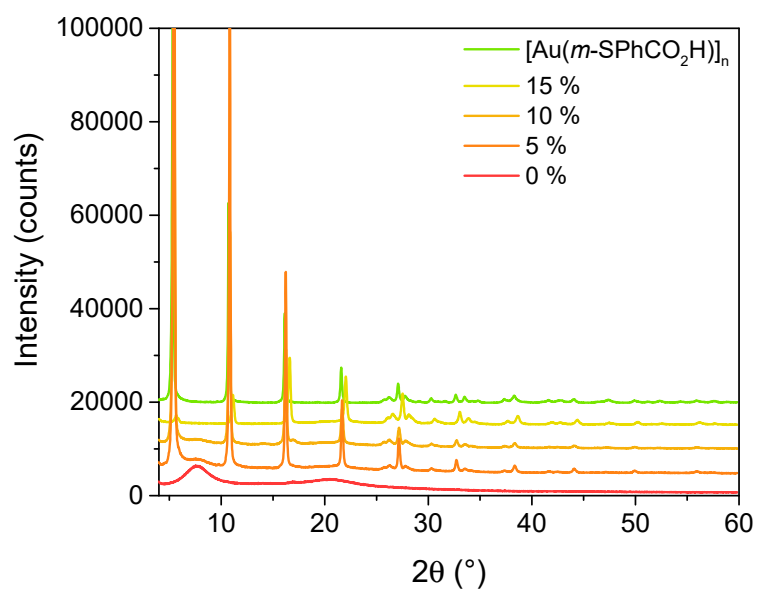

Figure 12. PXRD patterns of x % $[\text{Au}(m\text{-SPhCO}_2\text{H})]_n$ @PVK films.

## References

1. Veselska, O.; Okhrimenko, L.; Guillou, N.; Podbevšek, D.; Ledoux, G.; Dujardin, C.; Monge, M.; Chevrier, D. M.; Yang, R.; Zhang, P.; Fateeva, A.; Demessence, A., An intrinsic dual-emitting gold thiolate coordination polymer,  $[\text{Au}(+I)(p\text{-SPhCO}_2\text{H})]_n$ , for ratiometric temperature sensing. *J. Mater. Chem. C* **2017**, *5*, 9843.
2. Lavenn, C.; Guillou, N.; Monge, M.; Podbevšek, D.; Ledoux, G.; Fateeva, A.; Demessence, A., Shedding light on an ultra-bright photoluminescent lamellar gold thiolate coordination polymer  $[\text{Au}(p\text{-SPhCO}_2\text{Me})]_n$ . *Chem. Commun.* **2016**, *52*, 9063.
